# Supplementary figures and images for: Identification of an ortholog of the eukaryotic RNA polymerase III subunit RPC34 in Crenarchaeota and Thaumarchaeota suggests specialization of RNA polymerases for coding and non-coding RNAs in Archaea
Source: Springer Nature journal article supplement (doi:10.1186/1745-6150-4-39), 2009-01-01

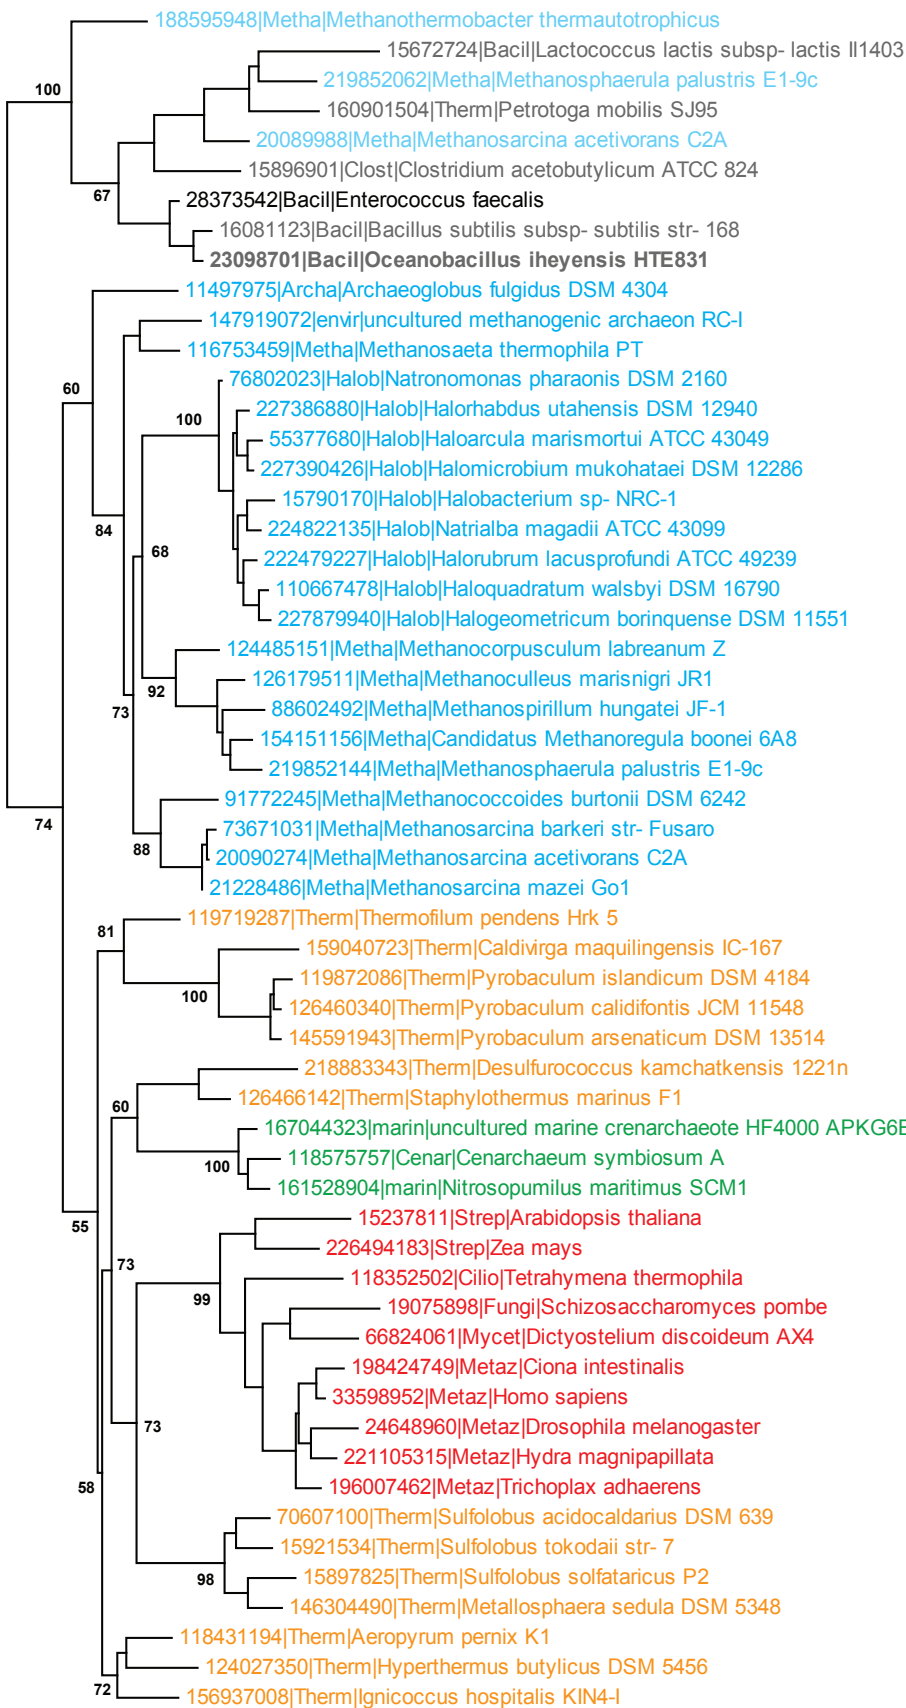

MarR

Euryarchaeota

Crenarchaeota

Thaumarchaeota

Eukaryota

Crenarchaeota

50

Supplement: Additional file 2 [file 1745-6150-4-39-s2.pdf]
